# Supplementary material for: Antibiotic Resistance and Genetic Variability of Acinetobacter spp. from Wastewater Treatment Plant in Kokšov-Bakša (Košice, Slovakia)
Source: Microorganisms. 2023 Mar 25;11(4):840. doi: 10.3390/microorganisms11040840 (PMC10143558; doi:10.3390/microorganisms11040840)
Supplement: Supplementary file 1 [file microorganisms-11-00840-s001.zip › TableS1.pdf]

**Table S1.** The physicochemical characteristics of the wastewater at the time of sampling on April 10, 2018 (Eastern Slovakia Water Utility Services Company in Košice, Slovakia).

| Physicochemical parameter                                    | Inflow | Outflow |
|--------------------------------------------------------------|--------|---------|
| Temperature (°C)                                             | 11.9   | 11.8    |
| pH                                                           | 7.5    | 7.46    |
| Biological oxygen demand (mg L <sup>-1</sup> )               | 251    | 1.7     |
| Chemical oxygen demand (mg L <sup>-1</sup> )                 | 519    | < 5     |
| Total dissolved solids (mg L <sup>-1</sup> )                 | 348    | < 2     |
| Suspended solids (mg L <sup>-1</sup> )                       | 636    | 469     |
| Total nitrogen (N) (mg L <sup>-1</sup> )                     | 56     | 6.31    |
| Organic nitrogen (N <sub>org</sub> ) (mg L <sup>-1</sup> )   | 28.9   | 1.46    |
| Nitrite (NO <sub>2</sub> -N) (mg L <sup>-1</sup> )           | 0.005  | 0.09    |
| Nitrate (NO <sub>3</sub> -N) (mg L <sup>-1</sup> )           | 1      | 3.05    |
| Ammonium nitrogen (NH <sub>4</sub> -N) (mg L <sup>-1</sup> ) | 26.1   | 1.71    |
| Total phosphorus (P) (mg L <sup>-1</sup> )                   | 4.48   | 0.3     |
| Phosphate (PO <sub>4</sub> -P) (mg L <sup>-1</sup> )         | 2.65   | 0.24    |
| Anionic surfactants (mg L <sup>-1</sup> )                    | 6.19   | 0.24    |
| Petroleum substances (mg L <sup>-1</sup> )                   | 0.50   | 0.17    |
