# Supplementary material for: Antibiotic Resistance and Genetic Variability of Acinetobacter spp. from Wastewater Treatment Plant in Kokšov-Bakša (Košice, Slovakia)
Source: Microorganisms. 2023 Mar 25;11(4):840. doi: 10.3390/microorganisms11040840 (PMC10143558; doi:10.3390/microorganisms11040840)
Supplement: Supplementary file 1 [file microorganisms-11-00840-s001.zip › TableS2.pdf]

**Table S2.** Correlation analysis of the prevalence of antibiotic resistance within the *Acinetobacter* community in the wastewater treatment plant in Kokšov-Bakša (Košice, Slovakia)

| <b>Resistance</b> | <b>Ampicillin</b> | <b>Tetracycline</b> | <b>Chloramphenicol</b> | <b>Kanamycin</b> | <b>Ciprofloxacin</b> |
|-------------------|-------------------|---------------------|------------------------|------------------|----------------------|
| Ampicillin        | 1 <sup>a</sup>    |                     |                        |                  |                      |
| Tetracycline      | -0.015            | 1                   |                        |                  |                      |
| Chloramphenicol   | 0.084             | 0                   | 1                      |                  |                      |
| Kanamycin         | 0.105             | 0.102               | -0.019                 | 1                |                      |
| Ciprofloxacin     | -0.024            | 0.172               | 0.206                  | -0.031           | 1                    |

<sup>a</sup> Pearson's correlation coefficient.
